# Supplementary material
Source: PubMed Central journal article supplement (PMC9613527)
Supplement: NIHMS1824287-supplement-1.pdf [file NIHMS1824287-supplement-1.pdf]

**Supplementary Table 1:** Clinicopathological characteristics of pancreatic ductal adenocarcinoma patients and non-disease controls.

|                                 | Discovery cohort<br>(n=101) | Training cohort<br>(n=96) | Validation cohort<br>(n=95) |
|---------------------------------|-----------------------------|---------------------------|-----------------------------|
| <b>Patients with PDAC</b>       | 44 (43.6%)                  | 62 (64.6%)                | 62 (65.3%)                  |
| Age, mean (SD), y               | 69.9 ( $\pm$ 9.1)           | 67.3 ( $\pm$ 10.4)        | 67.6 ( $\pm$ 7.9)           |
| Sex                             |                             |                           |                             |
| Male                            | 26 (59.1%)                  | 38 (61.3%)                | 41 (66.1%)                  |
| Female                          | 18 (40.9%)                  | 24 (38.7%)                | 21 (33.9%)                  |
| Cancer stage                    |                             |                           |                             |
| I                               | 14 (31.8%)                  | 13 (21.0%)                | 23 (37.1%)                  |
| II                              | 30 (68.2%)                  | 28 (45.2%)                | 27 (43.6%)                  |
| III                             | 0 (0.0%)                    | 10 (16.1%)                | 5 (8.1%)                    |
| IV                              | 0 (0.0%)                    | 10 (16.1%)                | 3 (4.8%)                    |
| NA                              |                             | 1 (1.6%)                  | 4 (6.5%)                    |
| CA19-9, mean (SD), U/mL         | -                           | 210.6 ( $\pm$ 192.4)      | 280.7 ( $\pm$ 230.0)        |
| <b>Non-disease participants</b> | 57 (56.4%)                  | 34 (35.4%)                | 33 (34.7%)                  |
| Age, mean (SD), y               | 55.4 ( $\pm$ 8.8)           | 40.2 ( $\pm$ 8.7)         | 41.0 ( $\pm$ 9.1)           |
| Sex                             |                             |                           |                             |
| Male                            | 57 (100.0%)                 | 15 (44.1%)                | 15 (45.5%)                  |
| Female                          | 0 (0.0%)                    | 19 (55.9%)                | 18 (54.6%)                  |
| CA19-9, mean (SD), U/mL         | -                           | 21.5 ( $\pm$ 17.4)        | 18.2 ( $\pm$ 22.3)          |

Supplementary Figure 1

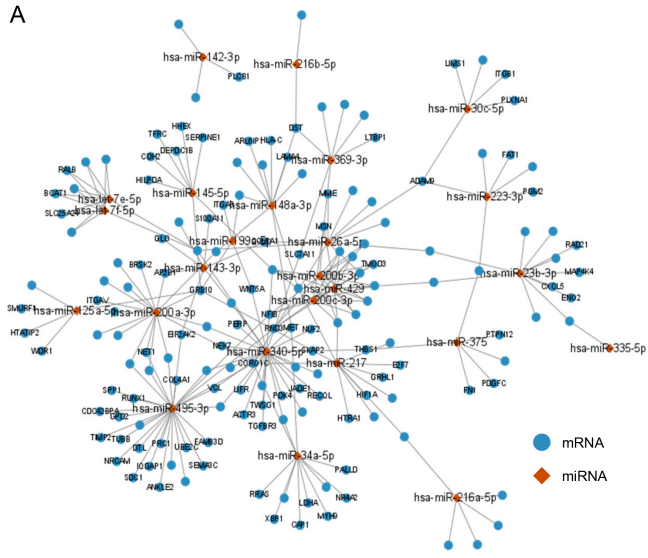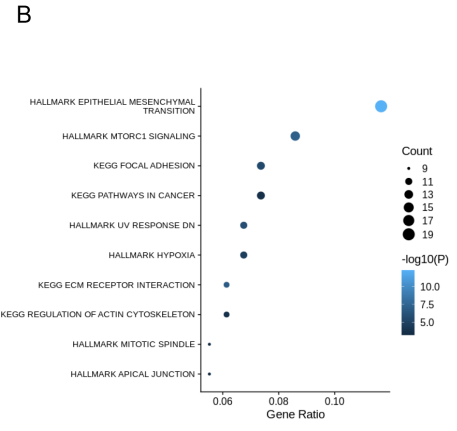

Supplementary Figure 2

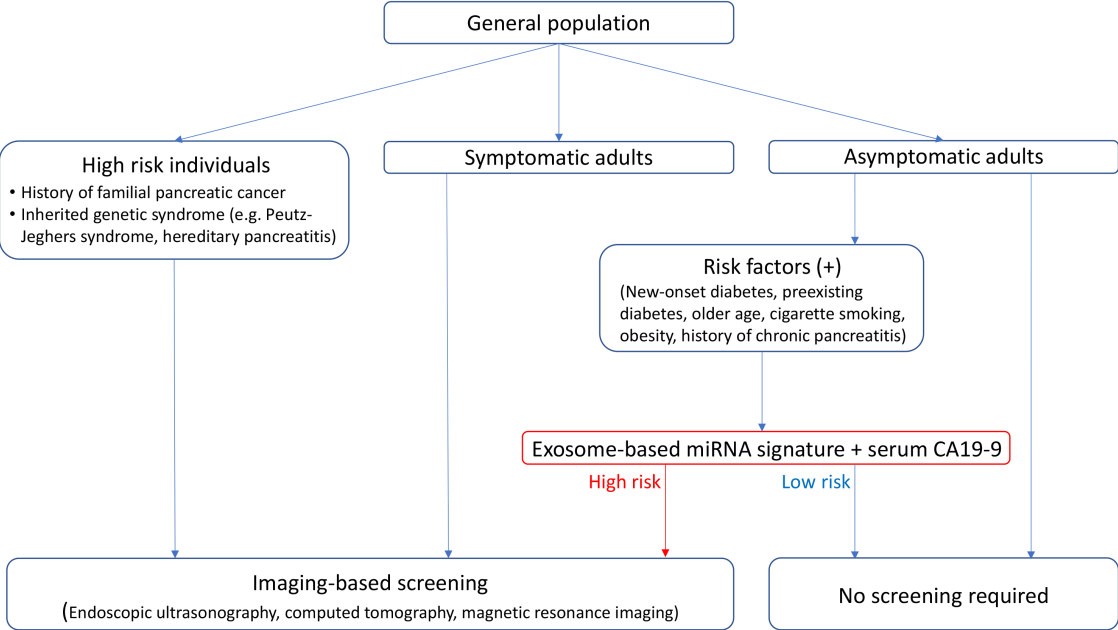

## **Supplementary Figure and Table Legend**

**Supplementary Figure 1:** miRNA regulatory network analysis and functional analysis of the miRNA target genes. **(A)** A miRNA-mRNA regulatory network analysis. **(B)** Functional analysis using hypergeometric tests on cancer hallmarks and KEGG pathways. Significantly enriched signaling pathways (BH-adjusted  $P < 0.001$ ) were illustrated in the dot plot.

**Supplementary Figure 2:** Schematic flow chart highlighting intended use of exosome-based miRNA signature for screening of PDAC. [PDAC: pancreatic ductal adenocarcinoma CA19-9: carbohydrate antigen 19-9]

**Supplementary Table 1.** Clinicopathological characteristics of pancreatic ductal adenocarcinoma patients and non-disease controls. [PDAC: pancreatic ductal adenocarcinoma; SD: standard deviation; NA; not available; CA19-9: carbohydrate antigen 19-9]
